# Supplementary material
Source: PubMed Central journal article supplement (PMC6317505)
Supplement: tobaccocontrol-2017-054112supp002.pdf [file tobaccocontrol-2017-054112supp002.pdf]

**Supplement 2**  
**Online Only Supplemental Tables**

1. **eTable 1.** Survey items for primary and secondary trial outcomes.
2. **eTable 2.** Interaction of trial arm and participant demographics and smoking frequency in predicting quit intentions, intent-to-treat analysis (n=719)
3. **eReferences.**

**eTable 1. Survey items for primary and secondary trial outcomes.**

For primary and secondary trial outcomes, all items assessed at Visit 5 except quit attempts which is also assessed at Visits 3 and 4. To confirm success of randomization, some items also assessed at Visits 1 or 2. Items appear in the same order as they appear in the surveys.

| Construct                      | Item                                                                                                                         | Response scale                                                                                                          | Source                                                                            |
|--------------------------------|------------------------------------------------------------------------------------------------------------------------------|-------------------------------------------------------------------------------------------------------------------------|-----------------------------------------------------------------------------------|
| Quit smoking for $\geq 7$ days | On how many of the last 7 days did you smoke cigarettes?                                                                     | 1=1 day<br>2=2 days<br>3=3 days<br>4=4 days<br>5=5 days<br>6=6 days<br>7=7 days<br>8=I did not smoke in the last 7 days | Adapted from PATH (2014) <sup>1</sup>                                             |
| Forgoing a cigarette           | In the last week, how often have you stopped yourself from having a cigarette because you wanted to <u>smoke less</u> ?      | 1=Never<br>2=1-2 times<br>3=3-4 times<br>4=5-9 times<br>5=10 or more times                                              | Adapted from Borland & Hill (1997) <sup>2</sup> and Li et al. (2014) <sup>3</sup> |
| Forgoing a cigarette           | In the last week, how often have you butted out a cigarette before you finished it because you wanted to <u>smoke less</u> ? | 1=Never<br>2=1-2 times<br>3=3-4 times<br>4=5-9 times<br>5=10 or more times                                              | Adapted from Li et al. (2014) <sup>3</sup>                                        |
| Quit attempts                  | In the last <u>week</u> , did you stop smoking for 1 day or longer because you were trying to quit smoking?                  | 1=Yes<br>2=No                                                                                                           | Adapted from Centers for Disease Control and Prevention (2008) <sup>4</sup>       |
| Quit attempts                  | In the last <u>3 weeks</u> , did you stop smoking for 1 day or longer because you were trying to quit smoking?               | 1=Yes<br>2=No                                                                                                           | Adapted from Centers for Disease Control and Prevention (2008) <sup>4</sup>       |
| Quit intentions                | How interested are you in quitting smoking in the next month?                                                                | 1=Not at all interested<br>2=A little interested<br>3=Somewhat interested<br>4=Very interested                          | Adapted from Klein, Zajac, and Monin (2009) <sup>5</sup>                          |

|                             |                                                                                                                                                                                                                                                                   |                                                                                |                                                          |
|-----------------------------|-------------------------------------------------------------------------------------------------------------------------------------------------------------------------------------------------------------------------------------------------------------------|--------------------------------------------------------------------------------|----------------------------------------------------------|
| Quit intentions             | How much do you plan to quit smoking in the next month?                                                                                                                                                                                                           | 1=Not at all<br>2=A little<br>3=Somewhat<br>4=Very much                        | Adapted from Klein, Zajac, and Monin (2009) <sup>5</sup> |
| Quit intentions             | How likely are you to quit smoking in the next month?                                                                                                                                                                                                             | 1=Not at all likely<br>2=A little likely<br>3=Somewhat likely<br>4=Very likely | Adapted from Klein, Zajac, and Monin (2009) <sup>5</sup> |
|                             | <p>The next few questions are about your awareness of health problems that may or may not be caused by smoking cigarettes.</p> <p>By “aware,” we mean you’ve heard this information before today. Please don’t guess – it’s okay to say that you’re not sure.</p> |                                                                                | New item                                                 |
|                             | <i>[Randomize order of awareness of health effects items]</i>                                                                                                                                                                                                     |                                                                                |                                                          |
| Awareness of health effects | <p>Are you aware that smoking cigarettes causes...</p> <p><u>Lung tumors?</u></p>                                                                                                                                                                                 | 1=Yes<br>2=No<br>3=Not sure                                                    | New item                                                 |
| Awareness of health effects | <p>Are you aware that smoking cigarettes causes...</p> <p><u>Lip cancer?</u></p>                                                                                                                                                                                  | 1=Yes<br>2=No<br>3=Not sure                                                    | New item                                                 |
| Awareness of health effects | <p>Are you aware that smoking cigarettes causes...</p> <p><u>Strokes?</u></p>                                                                                                                                                                                     | 1=Yes<br>2=No<br>3=Not sure                                                    | New item                                                 |
| Awareness of health effects | <p>Are you aware that smoking cigarettes causes...</p> <p><u>Throat cancer?</u></p>                                                                                                                                                                               | 1=Yes<br>2=No<br>3=Not sure                                                    | New item                                                 |
| Awareness of health effects | <p>Are you aware that smoking cigarettes causes...</p>                                                                                                                                                                                                            | 1=Yes<br>2=No<br>3=Not sure                                                    | New item                                                 |

|                             |                                                                                                         |                             |          |
|-----------------------------|---------------------------------------------------------------------------------------------------------|-----------------------------|----------|
|                             | <u>Kidney damage?</u>                                                                                   |                             |          |
| Awareness of health effects | Are you aware that smoking cigarettes causes...<br><br><u>Heart damage?</u>                             | 1=Yes<br>2=No<br>3=Not sure | New item |
|                             | The next few questions are about your awareness of chemicals that may or may not be in cigarette smoke. |                             | New item |
|                             | <i>[Randomize order of awareness of chemicals items]</i>                                                |                             |          |
| Awareness of chemicals      | Are you aware that cigarette smoke contains...<br><br><u>Arsenic?</u>                                   | 1=Yes<br>2=No<br>3=Not sure | New item |
| Awareness of chemicals      | Are you aware that cigarette smoke contains...<br><br><u>Ammonia?</u>                                   | 1=Yes<br>2=No<br>3=Not sure | New item |
| Awareness of chemicals      | Are you aware that cigarette smoke contains...<br><br><u>Formaldehyde?</u>                              | 1=Yes<br>2=No<br>3=Not sure | New item |
| Awareness of chemicals      | Are you aware that cigarette smoke contains...<br><br><u>Lead?</u>                                      | 1=Yes<br>2=No<br>3=Not sure | New item |
| Awareness of chemicals      | Are you aware that cigarette smoke contains...<br><br><u>Uranium?</u>                                   | 1=Yes<br>2=No<br>3=Not sure | New item |
| Awareness of chemicals      | Are you aware that cigarette smoke contains...<br><br><u>Benzene?</u>                                   | 1=Yes<br>2=No<br>3=Not sure | New item |

|                            |                                                                                                                                                                                                                                                                                                                            |                                                                   |                                                                                                                                                 |
|----------------------------|----------------------------------------------------------------------------------------------------------------------------------------------------------------------------------------------------------------------------------------------------------------------------------------------------------------------------|-------------------------------------------------------------------|-------------------------------------------------------------------------------------------------------------------------------------------------|
|                            | Now we're going to ask you some questions about the labels that we put on the side of your cigarette packs for the last 3 weeks. Please think about the labels when you're answering these questions. We are NOT asking about the Surgeon General's warning that was already on your cigarette packs when you bought them. |                                                                   | New item                                                                                                                                        |
|                            | <i>[Randomize order of negative affect items]</i>                                                                                                                                                                                                                                                                          |                                                                   |                                                                                                                                                 |
| Negative affect            | How much did the labels on your cigarette packs make you feel...<br><u>Anxious?</u>                                                                                                                                                                                                                                        | 1=Not at all<br>2=A little<br>3=Somewhat<br>4=Very<br>5=Extremely | Adapted from Nonnemaker et al. (2010) <sup>6</sup>                                                                                              |
| Negative affect            | How much did the labels on your cigarette packs make you feel...<br><u>Sad?</u>                                                                                                                                                                                                                                            | 1=Not at all<br>2=A little<br>3=Somewhat<br>4=Very<br>5=Extremely | Watson, Clark, and Tellegen (1988) <sup>7</sup>                                                                                                 |
| Negative affect            | How much did the labels on your cigarette packs make you feel...<br><u>Scared?</u>                                                                                                                                                                                                                                         | 1=Not at all<br>2=A little<br>3=Somewhat<br>4=Very<br>5=Extremely | Adapted from Nonnemaker et al. (2010) <sup>6</sup> and Watson, Clark, and Tellegen (1988) <sup>7</sup>                                          |
| Negative affect            | How much did the labels on your cigarette packs make you feel...<br><u>Guilty?</u>                                                                                                                                                                                                                                         | 1=Not at all<br>2=A little<br>3=Somewhat<br>4=Very<br>5=Extremely | Adapted from Nonnemaker et al. (2010) <sup>6</sup> and Keller and Block (1996) <sup>8</sup> and Watson, Clark, and Tellegen (1988) <sup>7</sup> |
| Negative affect            | How much did the labels on your cigarette packs make you feel...<br><u>Disgusted?</u>                                                                                                                                                                                                                                      | 1=Not at all<br>2=A little<br>3=Somewhat<br>4=Very<br>5=Extremely | Adapted from Nonnemaker et al. (2010) <sup>6</sup>                                                                                              |
| Thinking about the message | When you noticed your cigarette pack, how often did you think about the                                                                                                                                                                                                                                                    | 1=Never<br>2=Rarely<br>3=Sometimes                                | Adapted from Hammond et al. (2003) <sup>9</sup>                                                                                                 |

|                                            |                                                                                                                  |                                                                              |                                                                                          |
|--------------------------------------------|------------------------------------------------------------------------------------------------------------------|------------------------------------------------------------------------------|------------------------------------------------------------------------------------------|
|                                            | information that the labels convey?                                                                              | 4=Often<br>5=All the time                                                    |                                                                                          |
| Thinking about the message                 | When your cigarette pack was not in sight, how often did you think about the information that the labels convey? | 1=Never<br>2=Rarely<br>3=Sometimes<br>4=Often<br>5=All the time              | Adapted from Hammond et al. (2003) <sup>9</sup>                                          |
| Thinking about the harms of smoking        | How much did the labels make you think about the health problems caused by smoking?                              | 1=Not at all<br>2=A little bit<br>3=Somewhat<br>4=Quite a bit<br>5=Very much | Adapted from Borland et al. (2009) <sup>10</sup>                                         |
| Conversations about label                  | In the last week, how many times did you talk to other people about the label on your cigarette packs?           | # of times                                                                   | Adapted from Hall et al. (2015) <sup>11</sup> and Morgan et al. (In press) <sup>12</sup> |
| Thinking about the chemicals in cigarettes | In the last week, how much did you...<br><br>Think about the chemicals in the smoke from your cigarettes?        | 1=Never<br>2=Rarely<br>3=Sometimes<br>4=Often<br>5=All of the time           | New item                                                                                 |
| Thinking about the harms of smoking        | In the last week, how much did you...<br><br>Think about the harm your smoking might be doing to you?            | 1=Never<br>2=Rarely<br>3=Sometimes<br>4=Often<br>5=All of the time           | Adapted from Borland et al. (2009) <sup>10</sup>                                         |
| Thinking about the harms of smoking        | In the last week, how much did you...<br><br>Think about the harm your smoking might be doing to other people?   | 1=Never<br>2=Rarely<br>3=Sometimes<br>4=Often<br>5=All of the time           | Adapted from Borland et al. (2009) <sup>10</sup>                                         |
| Thinking about quitting                    | In the last week, how much did you...<br><br>Think about quitting smoking?                                       | 1=Never<br>2=Rarely<br>3=Sometimes<br>4=Often<br>5=All of the time           | New item                                                                                 |
|                                            | <i>[Randomize order of perceived likelihood items]</i>                                                           |                                                                              |                                                                                          |

|                                           |                                                                                                        |                                                                                |                                                 |
|-------------------------------------------|--------------------------------------------------------------------------------------------------------|--------------------------------------------------------------------------------|-------------------------------------------------|
| Perceived likelihood of harm from smoking | What is the chance that you will one day get <u>lung tumors</u> if you continue to smoke cigarettes?   | 1=No chance<br>2=Low chance<br>3=Moderate chance<br>4=High chance<br>5=Certain | Adapted from Brewer et al. (2016) <sup>13</sup> |
| Perceived likelihood of harm from smoking | What is the chance that you will one day get <u>throat cancer</u> if you continue to smoke cigarettes? | 1=No chance<br>2=Low chance<br>3=Moderate chance<br>4=High chance<br>5=Certain | Adapted from Brewer et al. (2016) <sup>13</sup> |
| Perceived likelihood of harm from smoking | What is the chance that you will one day get <u>kidney damage</u> if you continue to smoke cigarettes? | 1=No chance<br>2=Low chance<br>3=Moderate chance<br>4=High chance<br>5=Certain | Adapted from Brewer et al. (2016) <sup>13</sup> |
| Perceived likelihood of harm from smoking | What is the chance that you will one day get <u>heart damage</u> if you continue to smoke cigarettes?  | 1=No chance<br>2=Low chance<br>3=Moderate chance<br>4=High chance<br>5=Certain | Adapted from Brewer et al. (2016) <sup>13</sup> |

**eTable 2. Interaction of trial arm and participant demographics and smoking frequency in predicting quit intentions, intent-to-treat analysis (*n*=719)**

| <b>Moderator</b>                | <b><i>p</i></b> |
|---------------------------------|-----------------|
| Age                             |                 |
| 21-39 years                     | .87             |
| > 40 years                      |                 |
| Sex                             |                 |
| Male                            | .61             |
| Female                          |                 |
| Sexual orientation              |                 |
| Straight or heterosexual        | .97             |
| Gay, lesbian, or bisexual       |                 |
| Hispanic ethnicity              |                 |
| No                              | .38             |
| Yes                             |                 |
| Race                            |                 |
| White                           | .63             |
| Other                           |                 |
| Education                       |                 |
| Some college or less            | .72             |
| College graduate or more        |                 |
| Household income, annual        |                 |
| \$0-\$24,999                    | .89             |
| ≥ \$25,000                      |                 |
| Poverty status                  |                 |
| < 200% of federal poverty level | .54             |
| ≥ 200% of federal poverty level |                 |
| Smoking frequency               |                 |
| Daily                           | .002            |
| Nondaily                        |                 |

*Note.* The analyses examined the primary trial outcome, intention to quit smoking in the next month. No moderators were statistically significant after controlling for baseline quit intentions

## eReferences

1. Population Assessment of Tobacco and Health Study. PATH: Population Assessment of Tobacco and Health 2014 [Available from: <http://www.pathstudyinfo.nih.gov/UI/HomeMobile.aspx> accessed April 3 2014.
2. Borland R, Hill D. Initial impact of the new Australian tobacco health warnings on knowledge and beliefs. *Tob Control* 1997;6(4):317-25. doi: 10.1136/tc.6.4.317
3. Li L, Borland R, Fong GT, et al. Smoking-related thoughts and microbehaviours, and their predictive power for quitting: findings from the International Tobacco Control (ITC) China Survey. *Tob Control* 2015;24:354-61. doi: 10.1136/tobaccocontrol-2013-051384.
4. Centers for Disease Control and Prevention. Adult Tobacco Survey (ATS). 2008.
5. Klein WM, Zajac LE, Monin MM. Worry as a moderator of the association between risk perceptions and quitting intentions in young adult and adult smokers. *Ann Behav Med* 2009;38(3):256-61. doi: 10.1007/s12160-009-9143-2
6. Nonnemaker J, Farrelly M, Kamyab K, et al. Experimental study of graphic cigarette warning labels: Final results report. Research Triangle Park, NC: RTI International 2010.
7. Watson D, Clark LA, Tellegen A. Development and validation of brief measures of positive and negative affect: the PANAS scales. *J Pers Soc Psychol* 1988;54(6):1063.
8. Keller PA, Block LG. Increasing the persuasiveness of fear appeals: The effect of arousal and elaboration. *J Consumer Res* 1996;22(4):448-59.
9. Hammond D, Fong GT, McDonald PW, et al. Impact of the graphic Canadian warning labels on adult smoking behaviour. *Tob Control* 2003;12(4):391-95.
10. Borland R, Yong HH, Wilson N, et al. How reactions to cigarette packet health warnings influence quitting: Findings from the ITC Four-Country survey. *Addiction* 2009;104(4):669-75.
11. Hall MG, Peebles K, Bach LE, et al. Social interactions sparked by pictorial warnings on cigarette packs. *Int J Environ Res Public Health* 2015;12(10):13195-208. doi: 10.3390/ijerph121013195.
12. Morgan JC, Southwell BG, Noar SM, et al. Frequency and content of conversations about pictorial warnings on cigarette packs. *Nicotine Tob Res* 2017; doi: 10.1093/ntr/ntx180. [Epub ahead of print 17 August 2017].
13. Brewer NT, Hall MG, Lee JG, et al. Testing warning messages on smokers' cigarette packages: a standardised protocol. *Tob Control* 2016;25(2):153-59. doi: 10.1136/tobaccocontrol-2014-051661
